# Supplementary material for: Introducing Tempeh as a New Plant-Based Protein Food Item on the Danish Market
Source: MDPI journal article supplement (doi:10.3390/foods10112865), 2021-11-19
Supplement: s1 [file s1]

## HUT 1 – Survey: Tempeh

### Pre-test: Recruiting schedule

| Schedule structure                                                                                                                                                                                                                                                                                                                                                                                                                                                                                                                                                                                                                                                                                                                                                                                                                                                                                                                                                                                                                                                                                                                                                        | Scale/organization                                                                                                                                                                                                                                                                        |
|---------------------------------------------------------------------------------------------------------------------------------------------------------------------------------------------------------------------------------------------------------------------------------------------------------------------------------------------------------------------------------------------------------------------------------------------------------------------------------------------------------------------------------------------------------------------------------------------------------------------------------------------------------------------------------------------------------------------------------------------------------------------------------------------------------------------------------------------------------------------------------------------------------------------------------------------------------------------------------------------------------------------------------------------------------------------------------------------------------------------------------------------------------------------------|-------------------------------------------------------------------------------------------------------------------------------------------------------------------------------------------------------------------------------------------------------------------------------------------|
| Samtykke til opbevaring af personfølsomme oplysninger (In Danish)<br>Consent to collecting and keeping of personal information                                                                                                                                                                                                                                                                                                                                                                                                                                                                                                                                                                                                                                                                                                                                                                                                                                                                                                                                                                                                                                            | Yes/no                                                                                                                                                                                                                                                                                    |
| <p>Info text:</p> <p>You will receive a meal box that contains ingredients and a recipe for a dish with tempeh (evening meal). The dish is vegan.</p> <p>In the meal box, there will be ingredients to prepare a meal for the number of people in the household (1, 2, 3 or 4 people). It will not be possible to participate with children, as the dish must be assessed in a questionnaire afterwards.</p> <p>You choose on the following pages which dish you want and number.</p> <p>Prerequisite for participation:</p> <ul style="list-style-type: none"> <li>• You must be between 18 and 29 years old</li> <li>• You can order for 1, 2, 3 or 4 people in the same household</li> <li>• Everyone in the household must fill in a questionnaire after eating the dish</li> <li>• A photo of the finished dish must be uploaded to Instagram (if you have an account) with #tempehforsøgabsalon</li> </ul> <p>If you have the following allergies or intolerances, you cannot participate: celiac disease and / or gluten intolerance, wheat and other grains, soy, nuts, peanuts, fish and shellfish / molluscs, cross-allergic reactions to pollen and latex.</p> |                                                                                                                                                                                                                                                                                           |
| I want to sign up my household to try a dish with tempeh                                                                                                                                                                                                                                                                                                                                                                                                                                                                                                                                                                                                                                                                                                                                                                                                                                                                                                                                                                                                                                                                                                                  | Yes/no                                                                                                                                                                                                                                                                                    |
| Choose how many people between the ages of 18 and 29 who will participate in the household                                                                                                                                                                                                                                                                                                                                                                                                                                                                                                                                                                                                                                                                                                                                                                                                                                                                                                                                                                                                                                                                                | 1, 2, 3, 4                                                                                                                                                                                                                                                                                |
| Choose the dish you want to cook                                                                                                                                                                                                                                                                                                                                                                                                                                                                                                                                                                                                                                                                                                                                                                                                                                                                                                                                                                                                                                                                                                                                          | <p>1) Nordic summer rolls with teriyaki-marinated tempeh and sweet and sour peanut dip.</p> <p>2) Fried tempeh with green asparagus, orange miso-sauce, black sesame and cauliflower rice.</p> <p>3) Tempeh 'meatballs' with parsley and hazelnuts served in tomato sauce with pasta.</p> |
| Choose the reason for your dish of choice (you can choose several)                                                                                                                                                                                                                                                                                                                                                                                                                                                                                                                                                                                                                                                                                                                                                                                                                                                                                                                                                                                                                                                                                                        | <p>CATA</p> <ul style="list-style-type: none"> <li>- It sounds good</li> <li>- It sounds exciting</li> <li>- It sounds like something I/we know</li> <li>- I/we are curious</li> <li>- I/we think that this is the one I/we would like best</li> </ul>                                    |

|                                                                                                                                                                  |                                                                                                                                                                                                                                                                                                                                                                                                                                      |
|------------------------------------------------------------------------------------------------------------------------------------------------------------------|--------------------------------------------------------------------------------------------------------------------------------------------------------------------------------------------------------------------------------------------------------------------------------------------------------------------------------------------------------------------------------------------------------------------------------------|
|                                                                                                                                                                  | <ul style="list-style-type: none"> <li>- It sounds easy to make</li> <li>- It sounds healthy</li> <li>- This is something I/we have seen/heard about in the media</li> <li>- I/we have cooked it before</li> <li>- I/we like the sides</li> <li>- Write yourself _____</li> </ul>                                                                                                                                                    |
| Choose the reasons why you did not choose one of the other dishes (you can choose several)                                                                       | <ul style="list-style-type: none"> <li>- They do not sound good</li> <li>- They sound boring</li> <li>- They sound like something I/we do not know</li> <li>- I do not think I/we like them</li> <li>- They sound difficult to make</li> <li>- They sound unhealthy</li> <li>- I/we have not made them before</li> <li>- I/we have made them before</li> <li>- I/we do not like the sides</li> <li>- Write yourself _____</li> </ul> |
| Pick the day you would like to try a dish with tempeh<br>The meal box will be delivered between 14-17 o'clock on the chosen day and must be cooked the same day. | Monday d. 25/5 2020 – (ONLY Region Sjælland)<br>Tuesday d. 26/6 2020 (Region sjælland AND Region Hovedstaden)<br>Wednesday d. 27/5 2020 (ONLY Region Hovedstaden)                                                                                                                                                                                                                                                                    |
| Enter your name and delivery address                                                                                                                             |                                                                                                                                                                                                                                                                                                                                                                                                                                      |
| If you have special instructions in connection with delivery, state them here (eg entrance is in the yard, etc.)                                                 |                                                                                                                                                                                                                                                                                                                                                                                                                                      |
| Enter your e-mail address<br>It will be used for sending out a confirmation that you are involved in the trial and on the selected delivery date.                |                                                                                                                                                                                                                                                                                                                                                                                                                                      |

**Post-test: Survey**

|                                                            |                                                                 |
|------------------------------------------------------------|-----------------------------------------------------------------|
| <b>Questionnaire</b>                                       | <b>Scale</b>                                                    |
| <b>Consent</b>                                             | Yes/no                                                          |
| <b>Personal information</b><br><i>What is your gender?</i> | Woman, man, enter yourself____, do not want to submit an answer |
| <i>Age</i>                                                 | 18 - 21<br>22 - 25                                              |

|                                                                                                                                                                                                                                                                                                                                                                                                                                                                                                                                                                                                                                                                                                                                                                                                                                                                                        |                                                                                                                                                                                                                                      |
|----------------------------------------------------------------------------------------------------------------------------------------------------------------------------------------------------------------------------------------------------------------------------------------------------------------------------------------------------------------------------------------------------------------------------------------------------------------------------------------------------------------------------------------------------------------------------------------------------------------------------------------------------------------------------------------------------------------------------------------------------------------------------------------------------------------------------------------------------------------------------------------|--------------------------------------------------------------------------------------------------------------------------------------------------------------------------------------------------------------------------------------|
|                                                                                                                                                                                                                                                                                                                                                                                                                                                                                                                                                                                                                                                                                                                                                                                                                                                                                        | 26 - 29                                                                                                                                                                                                                              |
| <i>Place of residence</i>                                                                                                                                                                                                                                                                                                                                                                                                                                                                                                                                                                                                                                                                                                                                                                                                                                                              | Region Sjælland<br>Region Hovedstaden                                                                                                                                                                                                |
| <i>Education</i>                                                                                                                                                                                                                                                                                                                                                                                                                                                                                                                                                                                                                                                                                                                                                                                                                                                                       | Primary school or equivalent<br>Apprenticeship or apprenticeship in a subject<br>High school education<br>Short higher education (under 3 years)<br>Medium-term higher education (3-4 years)<br>Long higher education (over 4 years) |
| Did you participate in the preparation of the dish with tempeh?                                                                                                                                                                                                                                                                                                                                                                                                                                                                                                                                                                                                                                                                                                                                                                                                                        | Yes/No                                                                                                                                                                                                                               |
| <b>Consumer evaluation of general liking of the exemplary dish</b><br><i>To what extent did you like the dish as a whole?</i>                                                                                                                                                                                                                                                                                                                                                                                                                                                                                                                                                                                                                                                                                                                                                          | Hedonic<br>9 pkt.                                                                                                                                                                                                                    |
| <b>Consumer evaluation of general liking of tempeh in an exemplary dish</b><br><i>To what extent did you like tempeh in the dish?</i>                                                                                                                                                                                                                                                                                                                                                                                                                                                                                                                                                                                                                                                                                                                                                  | Hedonic<br>9 pkt.                                                                                                                                                                                                                    |
| <b>Consumer evaluation of suitability in the dish</b><br><i>To what extent do you think tempeh fits into the dish?</i>                                                                                                                                                                                                                                                                                                                                                                                                                                                                                                                                                                                                                                                                                                                                                                 | Hedonic<br>9 pkt.                                                                                                                                                                                                                    |
| <b>Meat substitute</b><br><i>To what extent do you think tempeh is a good substitute for animal protein sources?</i>                                                                                                                                                                                                                                                                                                                                                                                                                                                                                                                                                                                                                                                                                                                                                                   | Hedonic<br>9 pkt.                                                                                                                                                                                                                    |
| <b>Preparation of the dish</b><br><i>To what extent do you think the dish was easy to prepare?</i>                                                                                                                                                                                                                                                                                                                                                                                                                                                                                                                                                                                                                                                                                                                                                                                     | Hedonic<br>9 pkt. + det var ikke mig, der lavede maden                                                                                                                                                                               |
| <b>Preparation of tempeh</b><br><i>To what extent do you think the tempeh was easy to cook?</i>                                                                                                                                                                                                                                                                                                                                                                                                                                                                                                                                                                                                                                                                                                                                                                                        | Hedonic<br>9 pkt. + det var ikke mig, der lavede maden                                                                                                                                                                               |
| <b>Consumer evaluation of the culinary success factors of the dish</b><br>- <i>To what extent did the name and description of the dish live up to your expectations?</i><br>- <i>To what extent do you think the dish had an appetizing appearance?</i><br>- <i>To what extent do you think the dish had an appetizing smell?</i><br>- <i>To what extent do you think the dish had a good balance between sweet, salty, sour, bitter and umami (umami is what gives an experience of e.g. power, roundness, depth, strong broth)</i><br>- <i>To what extent do you think there was umami present in the dish (umami gives a taste and experience of e.g. power, roundness, depth, strong broth)?</i><br>- <i>To what extent do you think there was a good balance between the different textures in the dish?</i><br>- <i>To what extent do you think the dish was rich in flavor?</i> | Hedonic<br>9 pkt.                                                                                                                                                                                                                    |
| <b>Consumer evaluation of trying tempeh in a dish again</b><br><i>To what extent would you try to use tempeh again in other dishes?</i>                                                                                                                                                                                                                                                                                                                                                                                                                                                                                                                                                                                                                                                                                                                                                | Hedonic<br>9 pkt.                                                                                                                                                                                                                    |
| <b>Prior knowledge of tempeh</b><br><i>Did you know about tempeh prior to this study?</i>                                                                                                                                                                                                                                                                                                                                                                                                                                                                                                                                                                                                                                                                                                                                                                                              | Binomial<br>Yes/no                                                                                                                                                                                                                   |
| <b>Prior use of tempeh</b><br><i>Have you used tempeh in cooking before this study?</i>                                                                                                                                                                                                                                                                                                                                                                                                                                                                                                                                                                                                                                                                                                                                                                                                | Binomial<br>Yes/no                                                                                                                                                                                                                   |

|                                                                                                                                                                                                                                                                                                                                                                            |                         |
|----------------------------------------------------------------------------------------------------------------------------------------------------------------------------------------------------------------------------------------------------------------------------------------------------------------------------------------------------------------------------|-------------------------|
| <ul style="list-style-type: none"> <li>- If yes: Where do you buy your tempeh?</li> <li>- If no: Why not?</li> </ul>                                                                                                                                                                                                                                                       | -                       |
| <b>Prior use of other vegetarian protein sources</b><br><i>In the past week, have you used vegetarian protein sources other than tempeh in the preparation of dinner?</i> <ul style="list-style-type: none"> <li>- If yes: enter the 2 most commonly used</li> </ul>                                                                                                       | Binomial<br>Yes/No<br>- |
| <b>Elaboration / possibly</b><br><i>Is there anything you would like us to know about tempeh and the dishes that we have not asked?</i>                                                                                                                                                                                                                                    |                         |
| <b>Ending</b><br>'Thank you so much for the help'<br>The project is funded under Data- and Design-Driven Health Innovation (DDSI).<br>The Tempeh comes from Contempehrary, which is a local producer of tempeh made from Nordic ingredients.<br>You can read more about Contempehrary here:<br><a href="https://www.contempehrary.com/">https://www.contempehrary.com/</a> |                         |
